# Supplementary material
Source: Elsevier journal article supplement (https://www.sciencedirect.com/science/article/pii/S0048712021001006)

**ANEXO I.** Análisis de correlaciones de Spearman entre las valoraciones de las pruebas DIGITS, RAVLT075, RAVLT015, RAVLT015R al alta con TMTA, Test Barcelona Repeticiones (TBREP), Test Barcelona Denominaciones (TBDEN), Test Barcelona Comprension (TBCOMP) y PMR al ingreso (Bajo nivel educativo en la parte superior de la Figura y alto nivel educativo en la parte inferior)


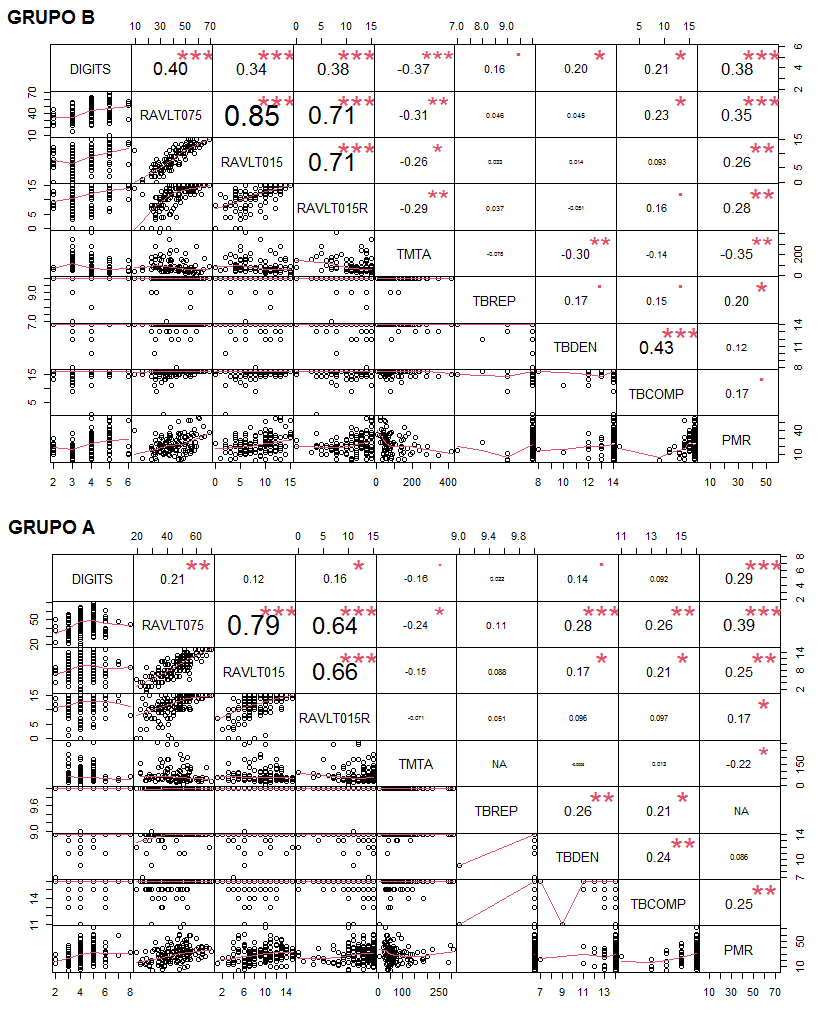

Supplement: mmc1 [file S0048712021001006:mmc1.doc]
